# Supplementary material
Source: Research Square preprint supplement (doi:10.21203/rs.3.rs-9059506/v1)
Supplement: Supplementary file 1 [file 0b3d826955e7aff4758207ea.docx]

**Extended Data Figure Legends**

**Extended Data Fig. 1. Extended characterization of hUC-MSC-mediated protection against KP infection. (A**) Longitudinal body weight changes following KP infection in mice pretreated with hUC-MSCs or PBS (*n* = 5–8). **(B**) Survival of mice pretreated with hUC‑MSCs via *i.t.* or *i.v.* delivery 8 days before infection (n = 6–8). **(C**) Frequency of neutrophils among CD45⁺ cells in BALF at 24 hpi. **(D**) Neutrophil frequencies and absolute counts in bone marrow (BM), peripheral blood, and spleen at 24 hpi (n = 5–9). **(E**) Frequencies and absolute numbers of total CD4+ T cells and Th1, Th2, Th17 subsets in lungs at indicated timepoints after KP infection (*n* = 3–5 per time point per group). **(F**) Principal component analysis (PCA) and volcano plot of lung transcriptomes at 24 hpi from PBS- and hUC-MSC-pretreated mice. **(G**) GSEA of lung transcriptomes at 24 hpi comparing PBS- and hUC-MSC-pretreated mice. Red: upregulated pathways; blue: downregulated (Normalized *P*-value < 0.001). **(H**) Lung bacterial burden and **(I**) corresponding survival curves of mice pretreated with hUC‑MSCs 16 days before infection (MSC‑16d) compared with PBS controls (*n* = 8). **(J**) Survival of adult (6-month-old) and aged (18-month-old) mice following hUC-MSCs pretreatment and KP infection (*n* = 7–8). Data are presented as mean ± SD. Student’s *t* test for (C), (E), (H). One-way ANOVA with Tukey’s post hoc test for (D). * *P* < 0.05; ** *P* < 0.01; *** *P* < 0.001. ns, not significant.

**Extended Data Fig. 2. Neutrophil depletion does not compromise hUC-MSC-mediated protection; clodronate liposomes efficiently deplete monocyte-macrophage compartments. (A**) Representative flow cytometry plots showing GFP+ signals in lung CD45+ cells 24 hours after *i.t.* administration of unlabeled hUC-MSCs or GFP-MSCs. **(B**) Representative flow cytometry plots (left) and quantification (right) of pulmonary neutrophil following *i.p.* injection of anti-Ly6G antibody or isotype control (100 μg per mouse), under uninfected conditions and at 24 hpi. (**C**) Lung bacterial burden at 24 hpi in PBS- or hUC‑MSC-pretreated mice receiving anti‑Ly6G antibody or isotype control prior to KP challenge (*n* = 5). (**D**) Flow cytometric quantification of lung AMs, MDMs, and neutrophils at 24 hpi following administration of liposomes via *i.t.* or *i.v.* routes in PBS- or hUC-MSC-pretreated mice (*n* = 3–4). Data are presented as mean ± SD. Significance was determined by a one-way ANOVA with Tukey’s post hoc test; *: *P* < 0.05; **: *P* < 0.01; ****: *P* < 0.0001. ns, not significant.

**Extended Data Fig. 3. hUC-MSCs pretreatment selectively promotes pulmonary eosinophil accumulation without inducing peripheral eosinophilia or type 2 immune activation. (A**) Flow cytometry quantification of EOS in BM, blood, and spleen from uninfected mice or KP-infected mice pretreated with PBS or hUC-MSCs at 24 hpi (*n* = 4–9). **(B**) EOS in BALF from PBS- or hUC-MSC-pretreated mice at indicated timepoints post-infection. Representative flow cytometry plots (left) and quantitative analysis (right) are shown (*n* = 5). n.d, not detected. **(C**) Flow cytometry analysis and quantification of pulmonary neutrophils, AMs, and monocyte/macrophages populations following *i.t* administration of recombinant CCL24 (1 μg) or PBS. **(D**) Lung levels of type 2 cytokines (IL-5 and IL-13) by ELISA at indicated timepoint post infection in PBS- or hUC-MSC-pretreated mice (*n* = 5). Data are presented as mean ± SD. One-way ANOVA with Tukey’s post hoc test in (A). Student’s *t* test for (B–D). **: *P* < 0.01; ***: *P* < 0.001; ****: *P* < 0.0001. ns, not significant.

**Extended Data Fig. 4. Generation of BmEOS and effects of IL-5 or CCR3 blockade on pulmonary immune cell composition following KP infection. (A**) Schematic of the *in vitro* BmEOS differentiation protocol (top) and subsequent identification by flow cytometry gating and Wright-Giemsa staining (bottom). **(B**) Flow cytometric quantification of lung neutrophils, AMs, and monocyte/macrophages at 24 hpi in mice treated with anti-IL-5 or isotype control antibody before KP infection (*n* = 4). **(C**) Representative flow cytometry plots of pulmonary EOS in lungs of PHIL mice and wild-type littermates. (**D**) Flow cytometric quantification of lung neutrophils, AMs, and monocyte/macrophages at 24 hpi in mice treated with anti-CCR3 or isotype control antibody before KP infection (*n* = 5). Data are presented as mean ± SD. Significance was determined by Student’s *t* test. *: *P* < 0.05. ns, not significant.

**Extended Data Fig. 5. Phenotypic and functional characterization of CD101⁺ activated versus CD101⁻ basal EOS. (A**) Flow cytometric quantification of activation marker expression (CD11c, CD11b and SiglecF) on pulmonary CD101⁺ versus CD101⁻ EOS at 24 hpi (*n* = 6). **(B**) Kinetics of CD101⁻ and CD101⁺ EOS subsets in the lung following KP infection, shown as percentages among CD45⁺ cells (left) and absolute EOS numbers in lung tissue (right) at indicated time points post infection (*n* = 4–7). **(C**) Flow cytometric gating strategy for identification of CD101⁺ and CD101⁻ BmEOS after 14-day differentiation with SCF, FLT3L, and IL-5. **(D**) Body weight changes of KP-infected mice following adoptive transfer of CD101⁺ or CD101⁻ BmEOS (1×10⁵ cells per mouse), compared with PBS control. **(E**) Representative fluorescence microscopy images of *mCherry*-labeled KP. Scale bar: 20 μm. **(F**) Bacterial CFU after 1 h co-incubation of KP with CD101⁺ or CD101⁻ BmEOS (MOI = 100), in the presence or absence of gentamicin (100 μg/mL). n.d., not detectable. **(G**) Flow cytometric analysis of activation marker expression (CD11b, CD11c, CD101, SiglecF) on EOS isolated from BM, blood and spleen of mice with or without KP infection at 24 hpi. Data are presented as mean ± SD. Student’s *t* test for (A), (G). One-way ANOVA with Tukey’s post hoc test for (B). * *P* < 0.05; ** *P* < 0.01; *** *P* < 0.001; **** *P* < 0.0001. ns, not significant.

**Extended Data Fig. 6. IL-33 directly activates EOS *in vitro* and *in vivo*. (A**) Flow cytometric quantification of activation marker expression (CD11b, CD11c, CD101 and SiglecF) on pulmonary EOS from PBS- or hUC-MSC-pretreated mice at 24 hpi (*n* = 6). (**B**) *In vitro* stimulation of BmEOS with recombinant IL-33 (10 ng/mL, 24 h). Bar graphs (top) and representative overlaid histograms (bottom) show upregulation of activation markers compared with vehicle control. **(C**) *In vivo* activation of pulmonary EOS following *i.t.* administration of recombinant IL-33 (1 μg) (*n* = 4). **(D**) UMAP visualization of IL-33 transcript expression across lung immune cell populations based on scRNA-seq data from KP-infected mice, with color intensity indicating relative IL-33 expression levels. Data are presented as mean ± SD. Student’s *t* test. * *P* < 0.05; ** *P* < 0.01; *** *P* < 0.001; **** *P* < 0.0001.

**Extended Data Fig. 7. Retrospective analysis of peripheral blood leukocyte profiles in KP-infected patients. (A) Comparison of peripheral total leukocyte, monocyte, neutrophil, and lymphocyte counts and percentages between survivors and nonsurvivors at admission (ADM) and discharge (DIS).** Statistical significance was assessed using two-way ANOVA with Šidák’s multiple comparisons test. *: *P* < 0.05; **: *P* < 0.01; ***: *P* < 0.001; ****: *P* < 0.0001. ns, not significant.

**Extended Data Fig. 8. FACS gating strategies in this study.**
