# Supplementary material
Source: Research Square preprint supplement (doi:10.21203/rs.3.rs-9059506/v1)
Supplement: Supplementary file 2 [file b4bd2a7658b2867ae60a6548.xlsx]

## Sheet: Sheet1
Table S3. Fluorescent antibodies used in the experiments.
Target	Fluorescent	Manufacturer	Clone	Cata.NO.
Zombie NIR™ Fixable Viability Kit	APC/Cyanine7	Biolegend		423106
Mouse CD45	BV605	Biolegend	30-F11	103140
Mouse CD45	FITC	Biolegend	30-F11	103108
Mouse CD11b	PerCP-Cyanine5.5	Biolegend	M1/70	101228
Mouse CD11c	Alexa Fluor® 700	Biolegend	N418	117320
Mouse Ly6G	BV421	Biolegend	1A8	127628
Mouse Ly6C	PerCP-Cyanine5.5	Biolegend	HK1.4	128012
Mouse SiglecF	PE	Biolegend	S17007L	155506
Mouse F4/80	APC	Biolegend	BM8	123116
Mouse F4/80	PE-Cyanine7	Biolegend	BM8	123113
Mouse CD101	PE-Cyanine7	Thermofisher	Moushi101	25-1011-82
Mouse MHCII	BV510	Biolegend	M5/114.15.2	107635
Mouse Arg1	APC	Thermofisher	A1exF5	17-3697-82
Mouse iNOS	Alexa Fluor® 488	Thermofisher	CXNFT	53-5920-82
Mouse CD4	PerCP-Cyanine5.5	Biolegend	RM4-5	100540
Mouse IFNγ	PE	Biolegend	XMG1.2	505808
Mouse IL-17A	PE	Biolegend	TC11-18H10.1	506903
Mouse IL-5	APC	Biolegend	TRFK5	504306
Mouse IL-13	PE	Biolegend	W17010B	159403
Mouse CD45.1	APC	Biolegend	A20	110713
Mouse CD45.2	FITC	Biolegend	104	109805
Mouse Sca-1	PerCP-Cyanine5.5	Biolegend	D7	108124
Mouse CD69	BV421	Biolegend	H1.2F3	104527
