# Supplementary material
Source: Research Square preprint supplement (doi:10.21203/rs.3.rs-9059506/v1)
Supplement: Supplementary file 3 [file be7066581ee1935f64e7b6c3.xlsx]

## Sheet: immune cell type markers
Table S1. Immune cell type markers in mouse lung datasets
Cell Type	Marker Genes
B	Cd19,Cd79a,Cd79b,Fcmr,Ms4a1,Ebf1,Igkc,Ighm
T cell	Cd3d,Cd3e,Cd3g,Cd4,Cd8a,Trbc2
Th17	Il22,Cxcr6,Rora,Il17f,Il17a
Treg	Foxp3,Tnfrsf4,Ctla4,Ikzf2,S100a6,Capg,S100a4,Maf,S100a10,Ifi27l2a
ILC2	Ctla2a,Il5,Calca,Areg,Rora,Gata3
NK	Klrb1c,Ncr1,Gzma,Klrg1,Nkg7,Klra4,Prf1
Alveolar macrophage	Chil3,Ear2,Lpl
Neutrophil	Ly6g,S100a8,S100a9,Mmp8,Mmp9,Retnlg
Monocytes/macrophages	Ly6c2,Ms4a6c,Tgfbi,Pid1,Vcan, Ccr2,Ly6c2,Fn1,Ifi205,F13a1,Vcan
DC	Cd74,H2-Ab1,H2-Aa,Cst3,Ccl17,Cd209a
pDC	Bst2,Tcf4,Irf8,Siglech,Klk1,Rnase6,Cox6a2
