# Supplementary material
Source: Research Square preprint supplement (doi:10.21203/rs.3.rs-9059506/v1)
Supplement: Supplementary file 4 [file f12a1722bc95080399e85ba8.xlsx]

## Sheet: Sheet1
Table S2. Brief characteristics of KP-infected inpatients
	survivors	nonsurvivors	P-value (survivors vs nonsurvivors)
Number	43	12
Age	67.3 ± 13.3	74.6 ± 16.5	0.28
Sex (M/F)	31/12	9/3
EOS(×10^9/L) ADM	0.037 ± 0.078	0.105 ± 0.144	0.09
Data are presented as means ± SD. Categorical variables in patients’ information were analyzed by Pearson’s chi-square tests, P<0.05 is considered significant.
